# Supplementary material for: Aerodynamic effects of leading edge erosion in wind farm flow modeling
Source: Copernicus journal article supplement (doi:10.5194/wes-2023-128), 2023-11-02
Supplement: Supplementary file [file wes-2023-128-AC1-supplement.pdf]

# Response to Anonymous Referee #1 comments of Manuscript ID WES-2023-128 entitled “Aerodynamic effects of leading edge erosion in wind farm flow modeling”

Thank you for taking the time to review our article. We have addressed your comments attentively, for which the details are provided below.

## Specific comments

:

1. pages 5-6, section 2.3: In this section the aerodynamic loss model is very briefly discussed. There are several unclear points:

- (a) lines 133-134: The manuscript reads: ”Indeed, the maximum loss registered for erosion-type damages never exceeded 64% and once roughness caused the transition to occur at the leading edge, the additional loss from more severe erosion was between 10-15%.”

It is stated that the maximum loss is 64%, but also argued about additional 10-15% loss. These statements are not clear. Please elaborate what is that additional severe erosion and how can a damage never exceed 64% but can have additional 10-15% losses?

The sentence can easily lead to confusion. Transition moving to the leading edge leads to a drop of up to 50 % and then severe erosion can add another 15 %, so you arrive at around 65 %. The sentence was simplified.

- (b) lines 138-142: The manuscript reads: ”To assess the aerodynamic losses at higher Reynolds numbers 2D CFD computations were performed for four airfoils with relative thickness below 21 % (NACA63-418, FFA-W3-211, DU96-W-180, Risø-B1-18, Risø-C2-18) for a Reynolds number range from 5 - 15 million and different levels of erosion. The latter was generated using the spectral approach detailed in (Meyer Forsting et al., 2022a) and combined with a forward-facing step (height of  $1.5 \times 10^{-3}$  in chord units) on the suction side to represent the worst erosion level. The surface perturbations were directly resolved in those simulations.”

The statement suggests that there were more Reynolds numbers considered, but in the results (e.g.: table in figure 3b), only 2 Re numbers are mentioned. Please clearly indicate if more Reynolds numbers are considered or not.

- What are these various erosion levels and how are they applied in CFD simulations?
- What is meant by ”the latter was generated using a spectral approach”?
- What is exactly simulated with ”spectral approach”?
- Were there more CFD methods applied? If so, what other methods are used?

Please provide a detailed explanation of the modeling of the erosion in the CFD simulations. Please also provide a brief description of the CFD methods employed and the basic set-up of the cases (e.g. number of grid elements, domain sizes, boundary conditions, etc.) for the sake of the repeatability and comparison for the possible future studies.

The number of Reynolds numbers are now mentioned explicitly in the text, but losses are only reported at both extremes. As the categories are already approximations, linearly interpolating between them is deemed sufficiently accurate. Furthermore we have added how the spectral roughness was generated and how the CFD simulations were performed, including the numerical setup. For details we refer to two papers, which should allow repeating our simulations, especially as the surface grid generator is open-source.

- (c) lines 144-145: What is meant by ”diminishing drop by about 15 percentage”? Could you please indicate lift-to-drag ratios for both Re numbers of 5e6 and 15e6 and re-formulate this sentence?

This sentence was removed and the entire paragraph rewritten to give more detail on how the categories were conceived. Some sentences were modified and moved. We know also clearly state that the categorization is a first attempt at trying to categorize leading edge damages aerodynamically.

- (d) lines 145-147: It is not clear how these 5 categories were defined and what do these categories refer to. Are these categories based on the erosion level/height? Also, what are the values represented in table 3b?

It is related to the type of damage observed on the blade. This is now more clearly defined in the text. Shown are losses in lift-to-drag, which should now be more easily understood after rewriting this section.

- (e) lines 147-148: The manuscript reads: "The first two categories capture the losses associated with the gradual movement of the transition location towards the leading edge over the entire blade section in question."

- Are categories "a" and "b" the first 2 or "b" and "c"?
- It is not clear how these categories capture the losses. Please explain how/why the transition location is moving towards the leading edge.
- Does the category "a" refer to a clean (no erosion) case? Please mention that.

Yes, category "a" refers to a clean blade. This has been clarified in the manuscript. The section was rewritten and now clearly states what the categories correspond to visually.

- (f) line 149: It is stated that pits and gouges are assumed. Do you mean that one of these categories (is category c meant here) can be related to pits and gouges of the real wind turbine blade situation? If this is the case, how are other categories related to the real erosion cases?

Hopefully the new text clarifies this, but of course the categories are uncertain and might be revised in the future.

- (g) lines 149-150: It is not clear how the additional losses are caused. It is also not clear what is meant by surface roughness and sharp steps. Is the surface roughness mentioned here different than pits and gouges? Are these sharp steps caused by erosion? Do you mean to relate the categories with real cases in these statements?

Yes we hope that we can have some equivalence to what is seen in inspection images, but of course this is difficult and subject to uncertainties.

- (h) line 152: Although a reference is given, I suggest to briefly explain how a 60:40 mix of transitional and fully turbulent performance can be obtained/calculated.

We added a footnote.

- (i) lines 153-154: What kind of losses are these? Are these the drop in lift-to-drag ratio (in percent)?

Yes this is now clarified.

2. general remark: Please explain the CFD simulations set up briefly and explain the procedure of defining the aerodynamic loss categorization in detail. It should be possible to generate this categorization for different Reynolds numbers based on this study.

We appreciate the detailed comments and have tried to address them by rewriting most of the section and adding information where it was lacking. As it is now also mentioned in the text, it is a first attempt at defining aerodynamic categories and more work remains to be done here.

3. It is not explained how the structural damage prediction model is coupled with the aerodynamic loss categorization to obtain figure 3c. Please provide details of this "summing" procedure.

The two individual schemes are not summed, and the authors agree that this is confusing due to the "+" symbol between figure 3(a) and 3(b) which has now been removed. Figure 3(a) and 3(b) show how each of the two submodels (damage prediction model and aerodynamic loss model) defines erosion categories based on their respective papers (see Visbeck, Jens, et al. "Introducing a data-driven approach to predict site-specific leading-edge erosion from mesoscale weather simulations", Wind Energ. Sci., 8, 2023 and Bak, Christian. "A simple model to predict the energy loss due to leading edge roughness." Journal of Physics: Conference Series. Vol. 2265. No. 3. IOP Publishing, 2022). These two definitions have to be combined, and figure 3(c) shows how we relate the encoded damage, shown on the x-axis, to the aerodynamic losses (percentage loss in lift-to-drag ratio), shown on the y-axis. This has also now been clarified in the manuscript.

4. lines 192-193: Could you please present the mentioned empirical relation and explain how the losses included into this relation?

The empirical relation was obtained from the paper introducing the aerodynamic loss model (see Bak, Christian. "A simple model to predict the energy loss due to leading edge roughness." Journal of Physics: Conference Series. Vol. 2265. No. 3. IOP Publishing, 2022), more specifically Eq. 17. The aerodynamic model has also been validated against a blade element momentum (BEM) model. For more details on the equations, we refer to the open-source aerodynamic loss tool (see Christian Bak, & Meyer Forsting, A. R. (2023). SALT - Simplified Aerodynamic Loss Tool (1.0.0 - beta). DTU Wind, Technical University of Denmark. <https://doi.org/10.5281/zenodo.7906333>)

5. Figure 5 caption and line 240: 2 different values are given for mean annual rainfall. Please check the values.  
Yes, these values should indeed be identical. This has been corrected.
6. line 264: "This corresponds to a 7% reduction..": is this a reduction in losses?  
This represents the reduction in AEP loss from modeling the full wind farm compared to the single turbine, i.e., going from 2.9 % to 2.7 %.
7. lines 264-269: Here it is argued that when the single turbine is considered the AEP is higher although the AEP loss is also higher compared to the wind farm case. This discussion needs a further elaboration/clearance.  
What is meant here, is simply that the absolute per-turbine AEP is higher for a single turbine since it is not exposed to wake effects like in a wind farm. However, by considering relative losses, i.e., to the non-eroded counterpart we are able to fairly compare the AEP losses despite this difference in absolute per-turbine AEP. The manuscript has been simplified to better clarify this.
8. Figure 8: It is not clear how exactly this graph is obtained. Maybe if the tables/graph in figure 3 explained in detail then this graph can be understood better. What is the (range of) Reynolds number considered for each blade section? Did you inter/extrapolate the values given in figure 3c for different Reynolds numbers?  
Figure 8 shows the losses in lift-to-drag ratio along the blade after different years. The damage prediction model allows for estimating the structural damage along the blade based on the rotational speed and thereby the local tangential velocity. This value is converted into an aerodynamic loss based on the relationship presented in Figure 3(c).  
With regards to Reynolds number, a constant value of  $5e+6$  was used for the entire blade. This decision was based on the limited airfoil information for the Vestas V80-2MW wind turbine and the typical distribution of Reynolds numbers for wind turbines of similar size. This has been clarified in the manuscript and an additional reference has been added with typical Reynolds number distributions for modern wind turbines.
9. line 323: Could you please explain what is meant by "... highly wakes instances"?  
It should have stated "waked" and not "wakes". This has been corrected.  
What is meant by "highly waked instances" is the periods where the wake loss in the wind farm is large, e.g., when the wind is coming from certain directions that align with the wind farm layout.
10. lines 343-344: It is stated that: "It is especially visible for the last couple of years." Could you please be more specific?  
The encoded damage ranges between 0 and 1, and for some of the upper quantiles the upper limit is reached which constrains the probability distribution. This is the case for the last couple of years. The manuscript has been updated to better describe this.
11. lines 343-344: What is an incubation period for this case and how this "feature" is observed?  
The incubation period refers to the initial phase of the erosion development where the effects are not observable. This has been clarified in the manuscript.
12. section 5: Very detailed and clear discussion on the applicability, shortcomings, and improvement points of the current model. Thanks for including this discussion here.  
Thank you.

## Technical corrections

:

1. line 165: "between" is repeated twice.  
This has been corrected.
2. Figures 3 a, b and c: Please enlarge these figures for better readability.  
The figure and text have now been made larger.
3. Figure 3b: please indicate the unit of the presented values.  
This has been updated.
4. Table 1: Is this table really necessary? Isn't it possible to mention these properties within the text?  
This table has been removed.
5. line 269: "an 7% reduction" should be "a .."  
This has been corrected.

6. line 270: ".. is run.." should be ".. are run .."  
[This has been corrected.](#)
7. line 319: ".. gain.Wake .." there should be a space ".. gain. Wake.."  
[This has been corrected.](#)
8. line 378: ".. was found be between .." should be ".. was found to be between .."  
[This has been corrected.](#)
9. line 474: ".. was found to 1.4 % .." should be ".. was found to be 1.4 % .."  
[This has been corrected.](#)
